# Supplementary material for: Design, synthesis, and biological activities of novel thiophene, pyrimidine, pyrazole, pyridine, coumarin and isoxazole: Dydrogesterone derivatives as antitumor agents
Source: publisher site journal article supplement (doi:10.1515/chem-2021-0028), 2021-01-01

## Supplementary material

Analytical and spectral data of some of the synthesized compounds using IR spectrum of compounds **2b**, **14b**;  $^1\text{H}$  NMR of compound **4** and Mass spectrometry of compounds **2c**, **5a**.

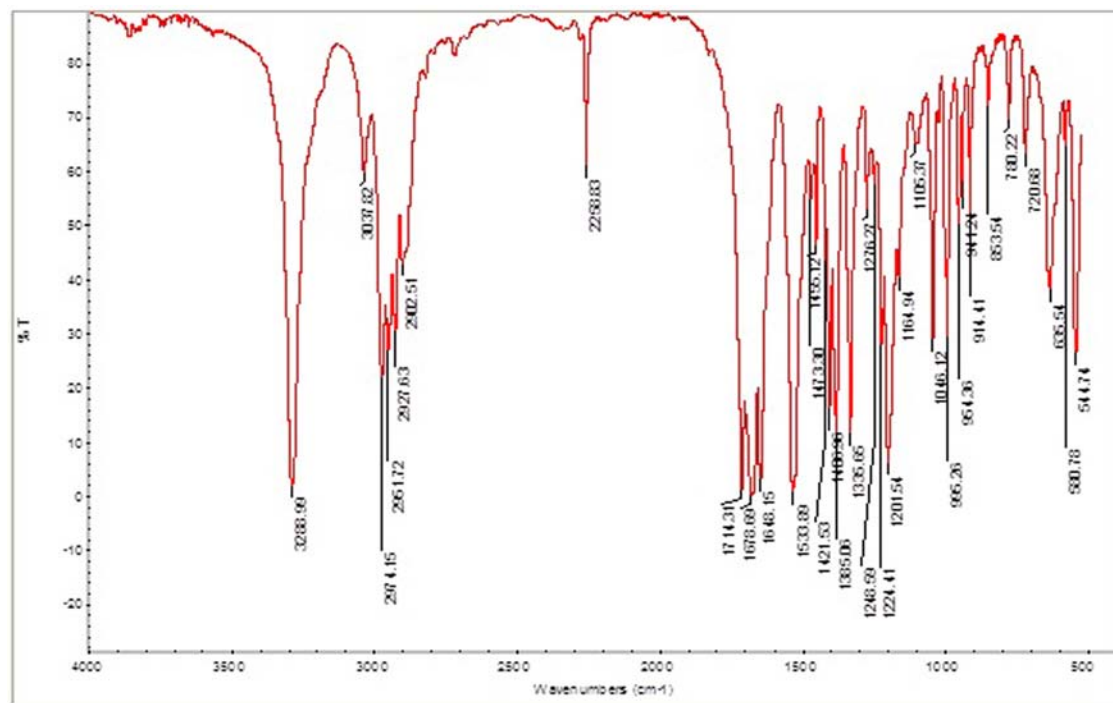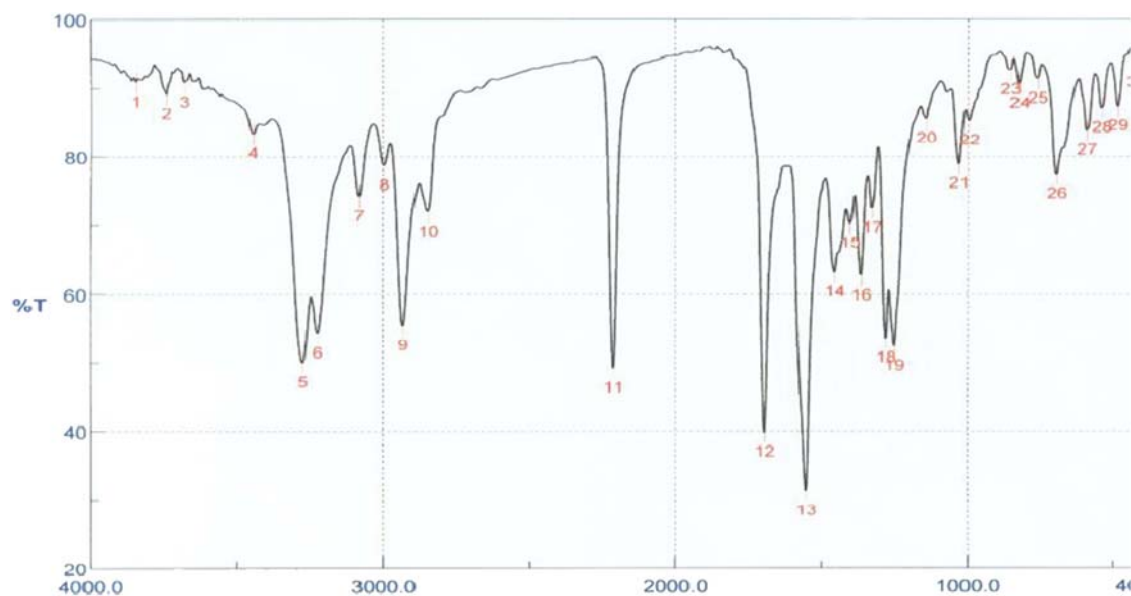

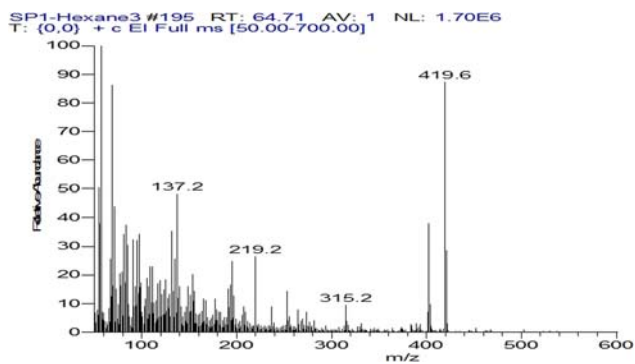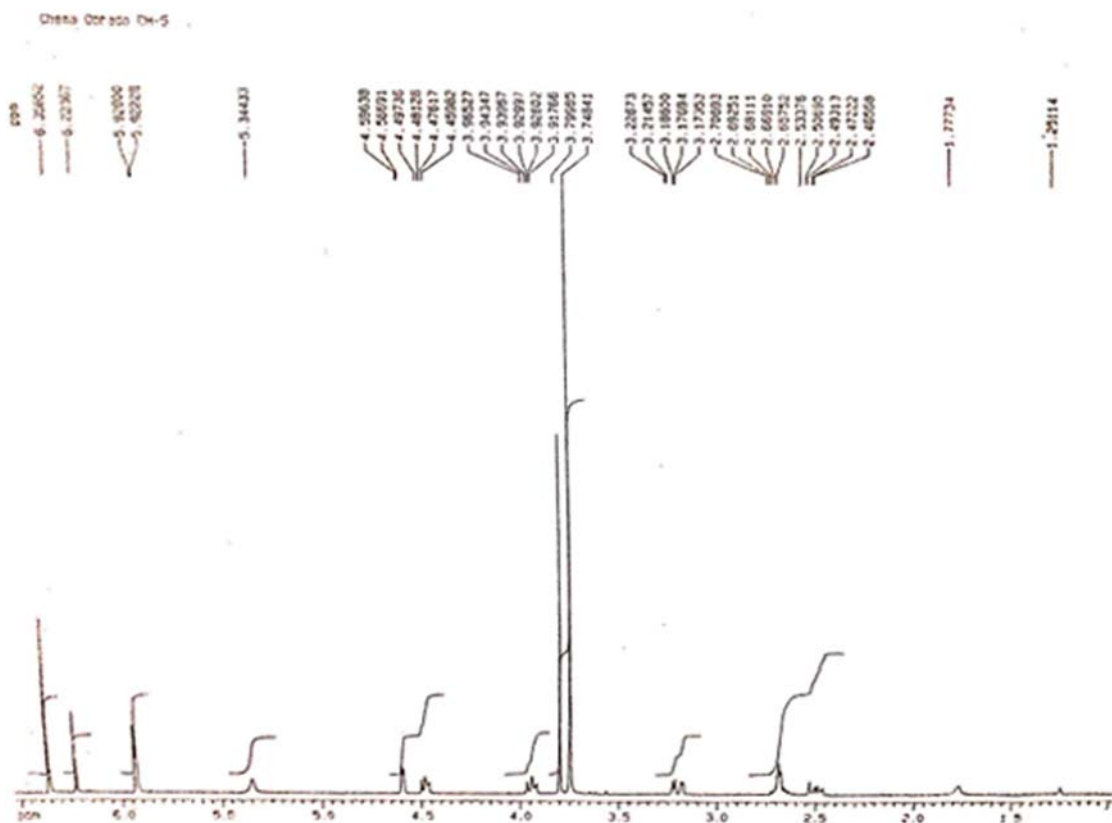

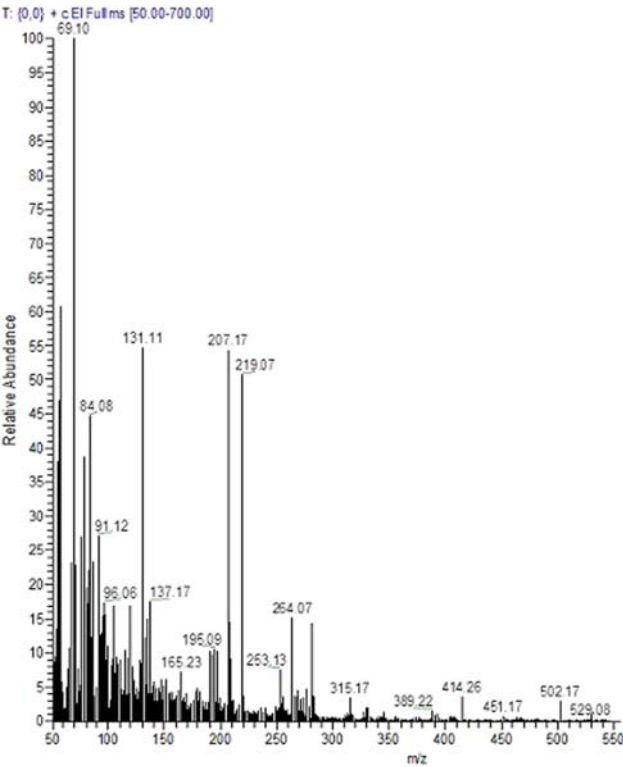

Supplement: Supplementary file 1 [file chem-2021-0028_sm.pdf]
